# Supplementary material for: Insights into the Origin of Metazoan Filopodia and Microvilli
Source: PubMed Central journal article supplement — Mol Biol Evol. 2013 Jun 14;30(9):2013–23. doi: 10.1093/molbev/mst110 (PMC3748353; doi:10.1093/molbev/mst110), 2013-06-14

## Supplementary Figure Legends

All branches in the phylogenetic trees follow the same taxonomic colour-code: Metazoa-Black (e.g. *Homo sapiens*, *Drosophila melanogaster*, *Daphnia pulex*, *Capitella teleta*, *Lottia gigantea*, *Nematostella vectensis*, *Amphimedon queenslandica*), Choanoflagellata-Green (*Monosiga brevicollis*, *Salpingoeca rosetta*), Filasterea-Red (*Capsaspora owczarzaki*), Fungi-Orange (e.g. *Laccaria bicolor*, *Saccharomyces cerevisiae*, *Allomyces macrogynus*, *Spizellomyces punctatus*), Apusozoa-Yellow (*Thecamonas trahens*), Amoebozoa-Blue (*Acanthamoeba castellanii*, *Dictyostelium discoideum*), Bikonta-Grey (*Arabidopsis thaliana*, *Ostreococcus taurii*, *Chlamydomonas reinhardtii* (Plantae), *Trichomonas vaginalis*, *Naegleria gruberi* (Excavata), *Thalassiosira pseudonana*, *Tetrahymena thermophila*, *Toxoplasma gondii* (Chromalveolata)).

**Fig. S1.** Maximum likelihood phylogenetic tree of FERM-domain containing genes, including ERM, Merlin and FERM4A. Alignment is based on the FERM domain and contains 408 amino acid positions. The tree was inferred by RAxML using the WAG+ $\Gamma$ +I model of evolution. The tree is rooted using FERM4A as an outgroup. Statistical support was obtained by RAxML with 100 bootstrap replicates (BV) and Bayesian Posterior Probabilities as inferred with MrBayes. PP. Both values are shown on key branches.

**Fig. S2.** (A) Schematic alignment of ERM proteins. Pfam domains are highlighted. Key amino acids for binding to the membrane lipid phosphatidylinositol 4,5-bisphosphate (PI(4,5)P<sub>2</sub>), involved in regulation, are highlighted in blue. Key amino acids for actin-binding are highlighted in green. Key amino acids after Turunen et al. 1994 and Niggli et al. 2007. Taxa include Aq (*Amphimedon queenslandica*), Bf (*Branchiostoma floridae*), Co (*Capsaspora owczarzaki*), Dm (*Drosophila melanogaster*), Dp (*Daphnia pulex*), Hs (*Homo sapiens*), Mb (*Monosiga brevicollis*), Nv (*Nematostella vectensis*) and Sr (*Salpingoeca rosetta*). (B) Schematic alignment of fascin proteins, showing the four consecutive fascin protein domains. Key amino acids for protein folding are highlighted in blue. Key amino acids for actin-bundling activity are highlighted in green. Key amino acids after Sedeh et al. (2010) and Zanet et al. (2012). Taxa include Aq (*Amphimedon queenslandica*), Co (*Capsaspora owczarzaki*), Ct (*Capitella teleta*), Dm (*Drosophila melanogaster*), Dp (*Daphnia pulex*), Hs (*Homo sapiens*), Lg (*Lottia gigantea*), Mb (*Monosiga brevicollis*), Nv (*Nematostella vectensis*) and Sr (*Salpingoeca rosetta*).

**Fig. S3.** Maximum likelihood phylogenetic tree of formin proteins. The alignment is based on the FH2 domain and comprises 308 amino acid positions. The tree was inferred by RAxML using the WAG+ $\Gamma$ +I model of evolution. The tree is rooted using the midpoint-root option. Statistical support was obtained by RAxML with 100 bootstrap replicates (BV) and by BPP. Both values are shown on key branches. Domain architectures for each class are shown. Taxa include Ac (*Acanthamoeba castellanii*), Am (*Allomyces macrogynus*), Aq (*Amphimedon queenslandica*), At (*Arabidopsis thaliana*), Co (*Capsaspora owczarzaki*), Cr (*Chlamydomonas reinhardtii*), Ct (*Capitella teleta*), Dd (*Dictyostelium discoideum*), Dm (*Drosophila melanogaster*), Dp

(*Daphnia pulex*), Hs (*Homo sapiens*), Lb (*Laccaria bicolor*), Lg (*Lottia gigantea*), Mb (*Monosiga brevicollis*), Ng (*Naegleria gruberi*), Nv (*Nematostella vectensis*), Ot (*Ostreococcus tauri*), Sc (*Saccharomyces cerevisiae*), Sp (*Spizellomyces punctatus*), Sr (*Salpingoeca rosetta*), Tg (*Toxoplasma gondii*), Tp (*Thalassiosira pseudonana*), Tte (*Tetrahymena thermophila*), Tt (*Thecamonas trahens*), Tv (*Trichomonas vaginalis*). Sequences used for this tree are reported in Table S1.

**Fig. S4.** Schematic representation of the eukaryotic tree of life showing the distribution of the different formin classes. A black dot indicates the presence of clear homologs, whereas a dashed dot indicates the presence of putative or degenerate homologs. Absence of a dot indicates that an homolog is lacking in that taxon. \*Choanoflagellate Diaphanous homologs lack a clear CRIB domain. †Only two *Naegleria gruberi* proteins cluster with Diaphanous, but they don't have a canonical DRF structure (Drf\_GBD-Drf\_FH3-FH2-DAD). ‡Among other eukaryotes, only the excavates *Naegleria gruberi* and *Trichomonas vaginalis* have bona fide DRF proteins. †Defined as having the Drf\_GBD-Drf\_FH3-FH2-DAD domain architecture.

**Fig. S5.** ML of gelsolin proteins. The alignment is based on the gelsolin domains and comprises 270 amino acid positions. The tree was inferred by RAxML using the WAG+ $\Gamma$ +I model of evolution. The tree is rooted using the midpoint-root option. Statistical support was obtained by RAxML with 100 bootstrap replicates (BV) and BPP. Both values are shown on key branches. Domain architectures for each class are shown. Taxa include Ac (*Acanthamoeba castellanii*), Am (*Allomyces macrogynus*), Aq (*Amphimedon queenslandica*), At (*Arabidopsis thaliana*), Co (*Capsaspora owczarzaki*), Ct (*Capitella teleta*), Dd (*Dictyostelium discoideum*), Dm (*Drosophila melanogaster*), Dp (*Daphnia pulex*), Hs (*Homo sapiens*), Lg (*Lottia gigantea*), Mb (*Monosiga brevicollis*), Ng (*Naegleria gruberi*), Nv (*Nematostella vectensis*), Sp (*Spizellomyces punctatus*), Sr (*Salpingoeca rosetta*), Tp (*Thalassiosira pseudonana*), Tt (*Thecamonas trahens*). Sequences used are reported in Table S1.

**Fig. S6.** Maximum likelihood phylogenetic tree of WASP proteins. The alignment comprises 139 amino acid positions. The tree was inferred by RAxML using the WAG+ $\Gamma$ +I model of evolution. The tree is rooted using the midpoint-root option. Statistical support was obtained by RAxML with 100 bootstrap replicates (BV) and BPP. Both values are shown on key branches. Domain architectures for each class are shown. Sequences used are reported in Table S1.

**Fig. S7.** Maximum likelihood phylogenetic tree of RhoGTPase proteins from unikont taxa. The alignment is based on the Ras domain and comprises 153 amino acid positions. The tree was inferred by RAxML using the WAG+ $\Gamma$ +I model of evolution. The tree is rooted using the MIRO GTPases as an outgroup. Statistical support was obtained by RAxML with 100 bootstrap replicates (BV) and BPP. Both values are shown on key branches. Domain architectures for each class are shown. Taxa include Ac (*Acanthamoeba castellanii*), Am (*Allomyces macrogynus*), Aq (*Amphimedon queenslandica*), Co (*Capsaspora owczarzaki*), Ct (*Capitella teleta*), Dd (*Dictyostelium discoideum*), Dm (*Drosophila melanogaster*), Dp (*Daphnia pulex*), Hs (*Homo sapiens*), Lb (*Laccaria bicolor*), Lg (*Lottia gigantea*), Mb (*Monosiga brevicollis*), Nv (*Nematostella*

*vectensis*), *Sc* (*Saccharomyces cerevisiae*), *Sp* (*Spizellomyces punctatus*), *Sr* (*Salpingoeca rosetta*), *Tt* (*Thecamonas trahens*). Newly classified sequences are reported in Table S1.

**Fig. S8.** Maximum likelihood phylogenetic tree of abLIM and other LIM-domain containing proteins. The alignment comprises 239 amino acid positions. The tree was inferred by RAxML using the WAG+ $\Gamma$ +I model of evolution. The tree is rooted using the midpoint-root option. Statistical support was obtained by RAxML with 100 bootstrap replicates (BV) and BPP. Both values are shown on key branches. Sequences used are reported in Table S1.

**Fig. S9.** Maximum likelihood phylogenetic tree of IMD-domain containing proteins. The alignment is based on the IMD domain and comprises 180 amino acid positions. The tree was inferred by RAxML using the WAG+ $\Gamma$ +I model of evolution. The tree is rooted using the midpoint-root option. Statistical support was obtained by RAxML with 100 bootstrap replicates (BV) and BPP. Both values are shown on key branches. Domain architectures for each class are shown. Sequences used are reported in Table S1.

**Table S1.** Sequences used in study.

Fig. S1

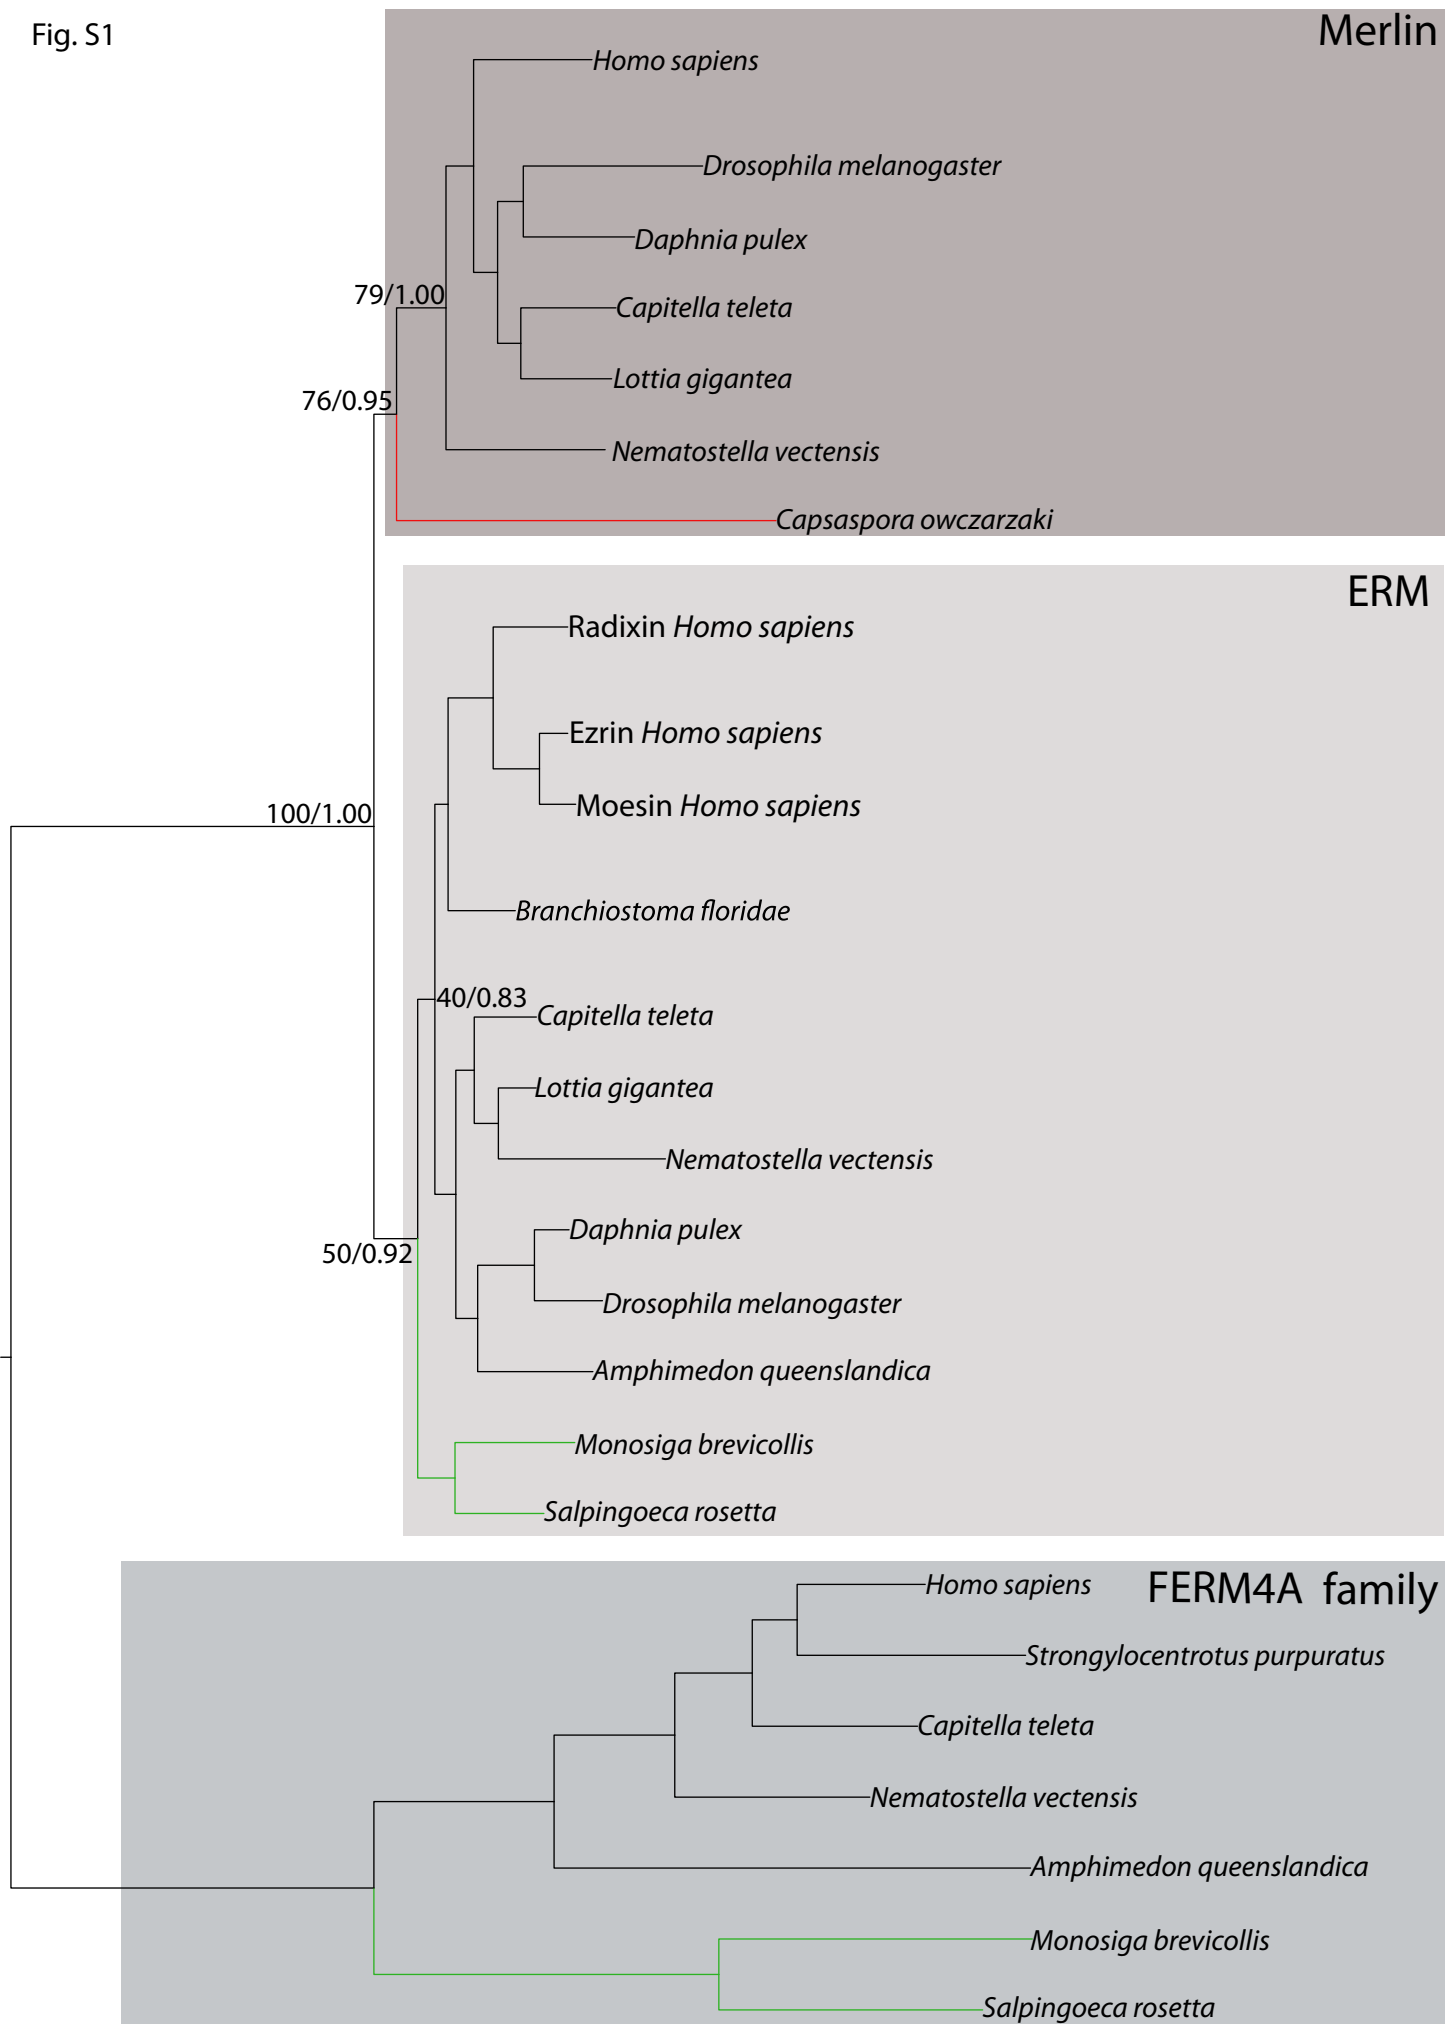

**A**

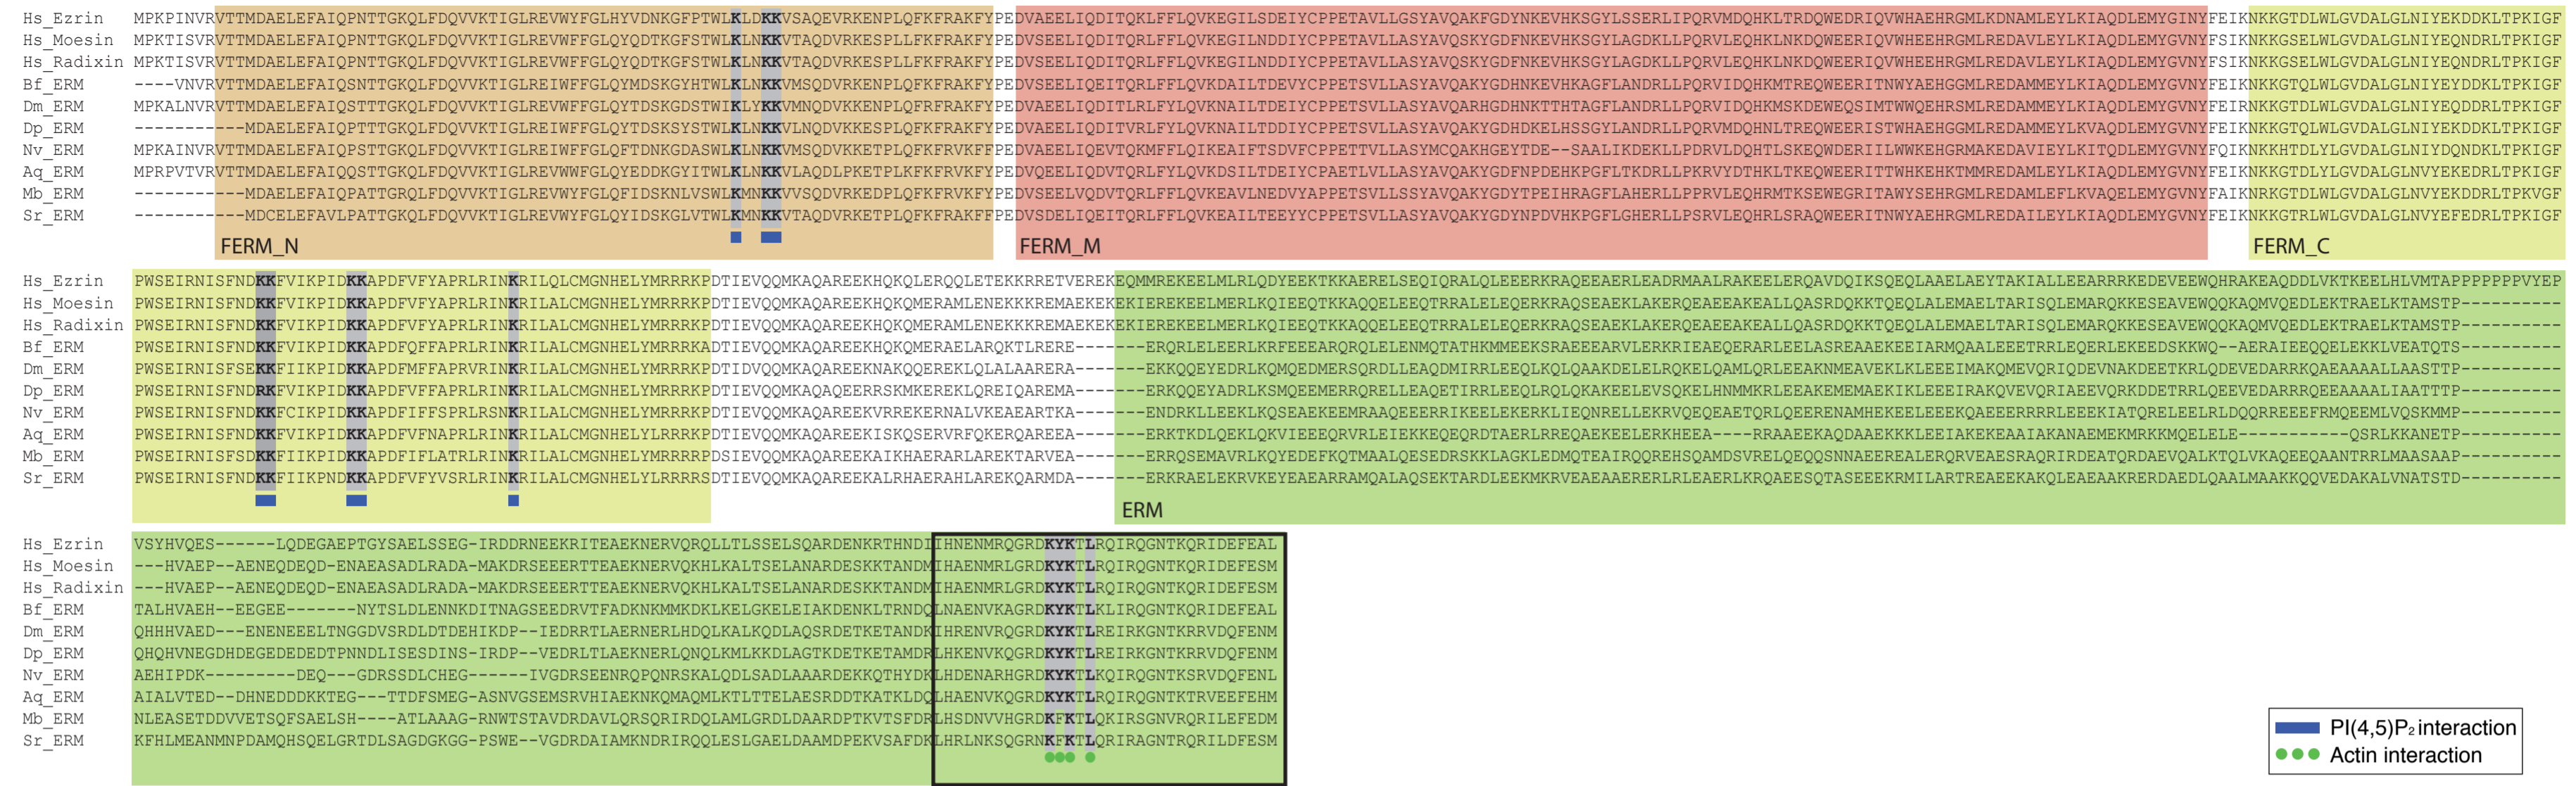

**B**

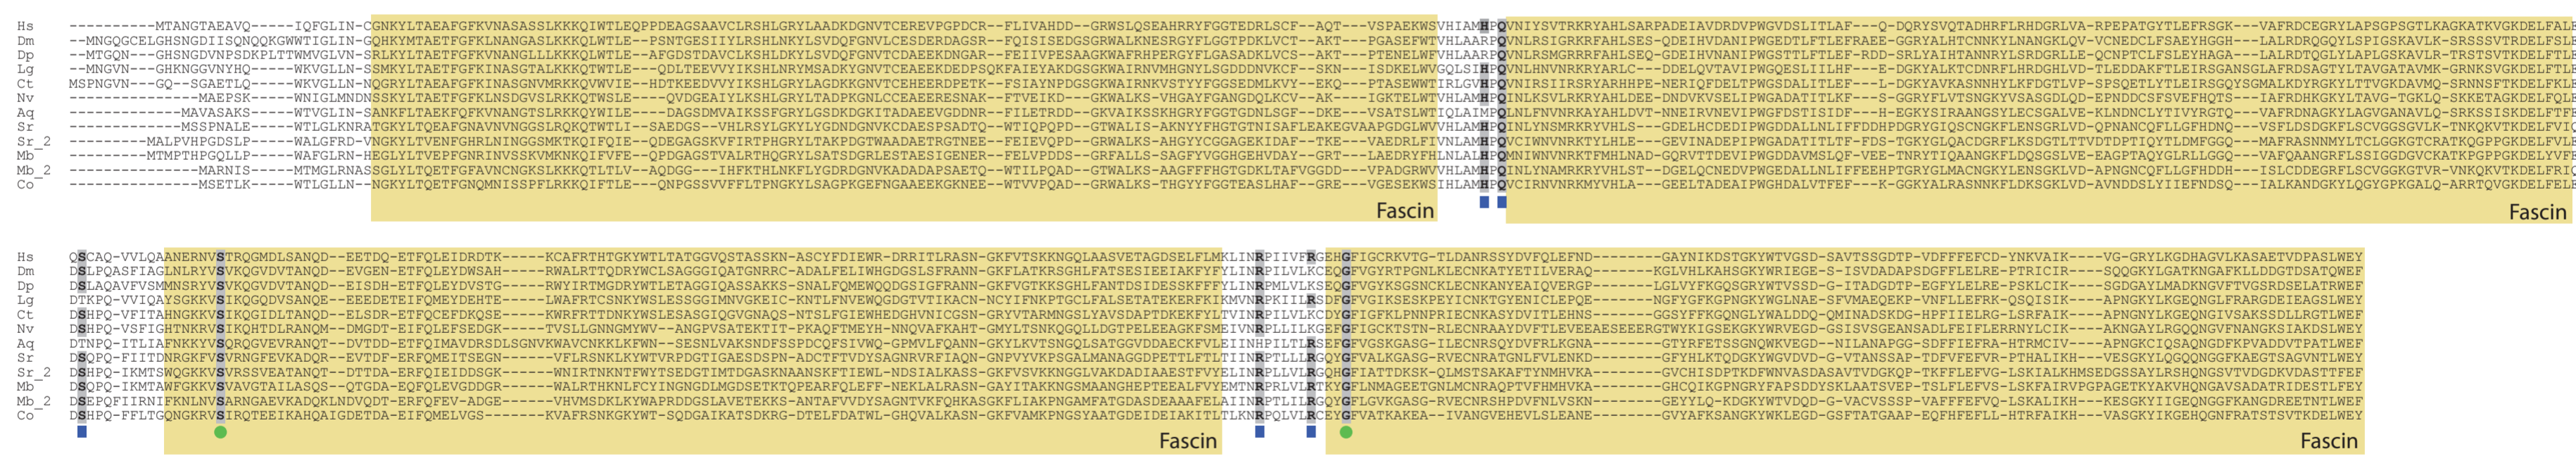

Fig. S2

Fig. S3

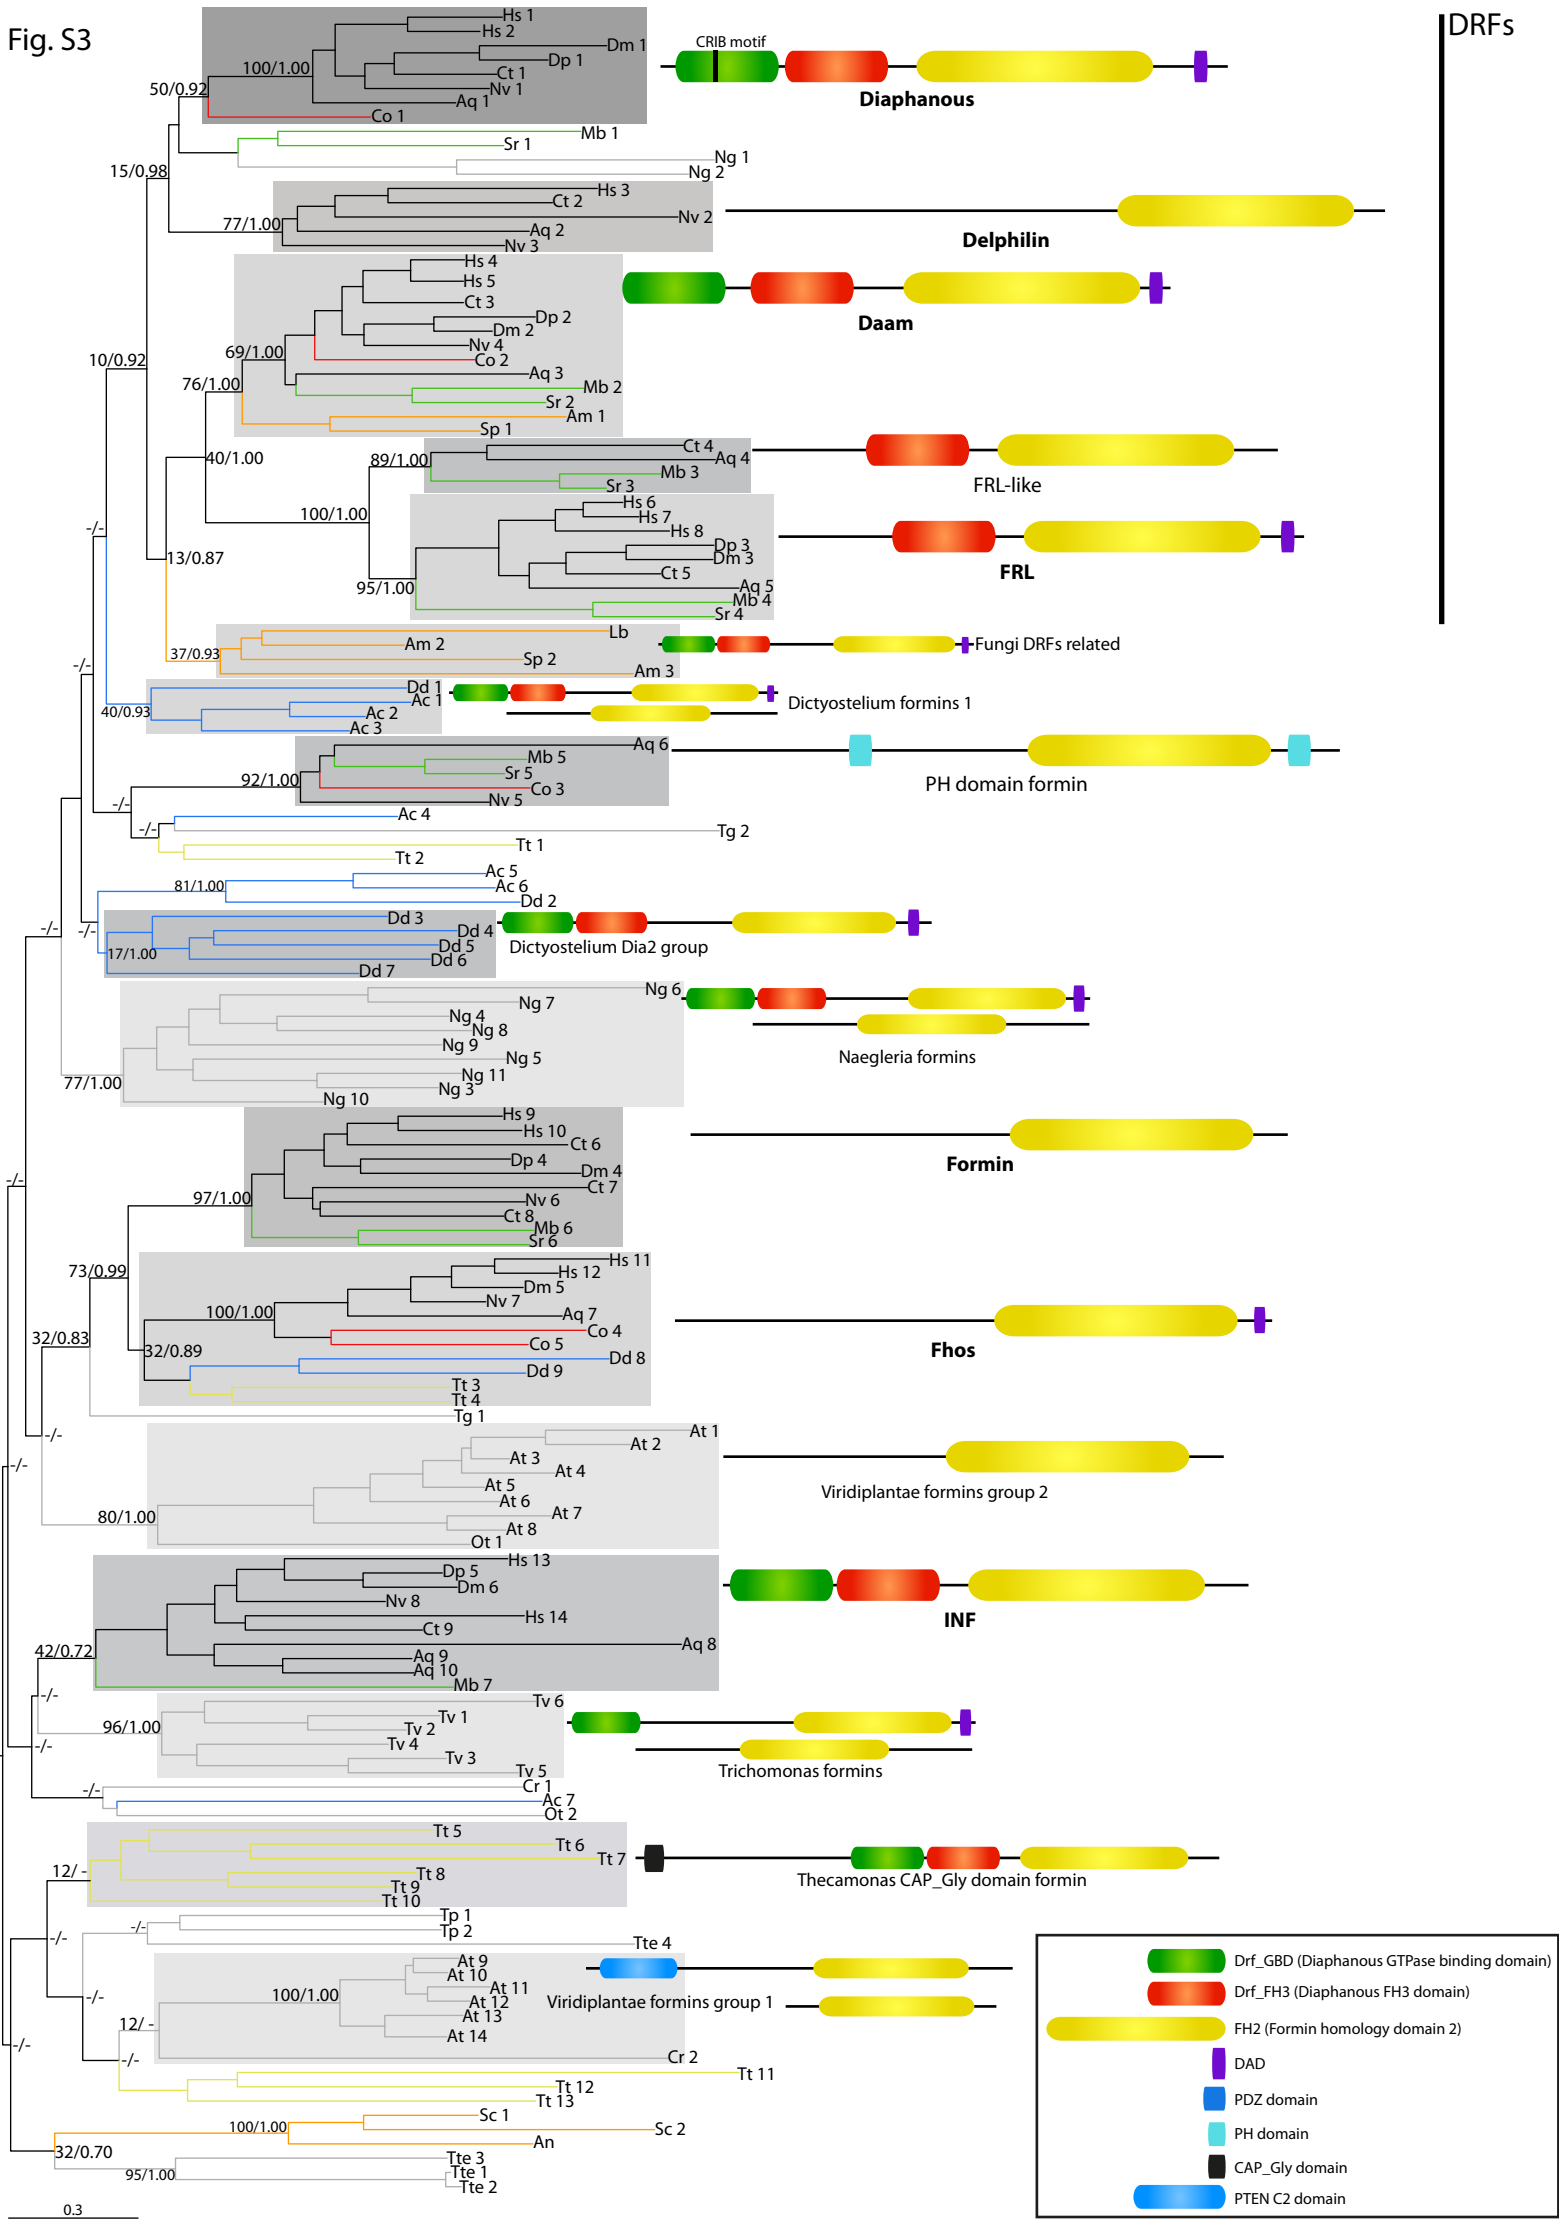

Fig. S4

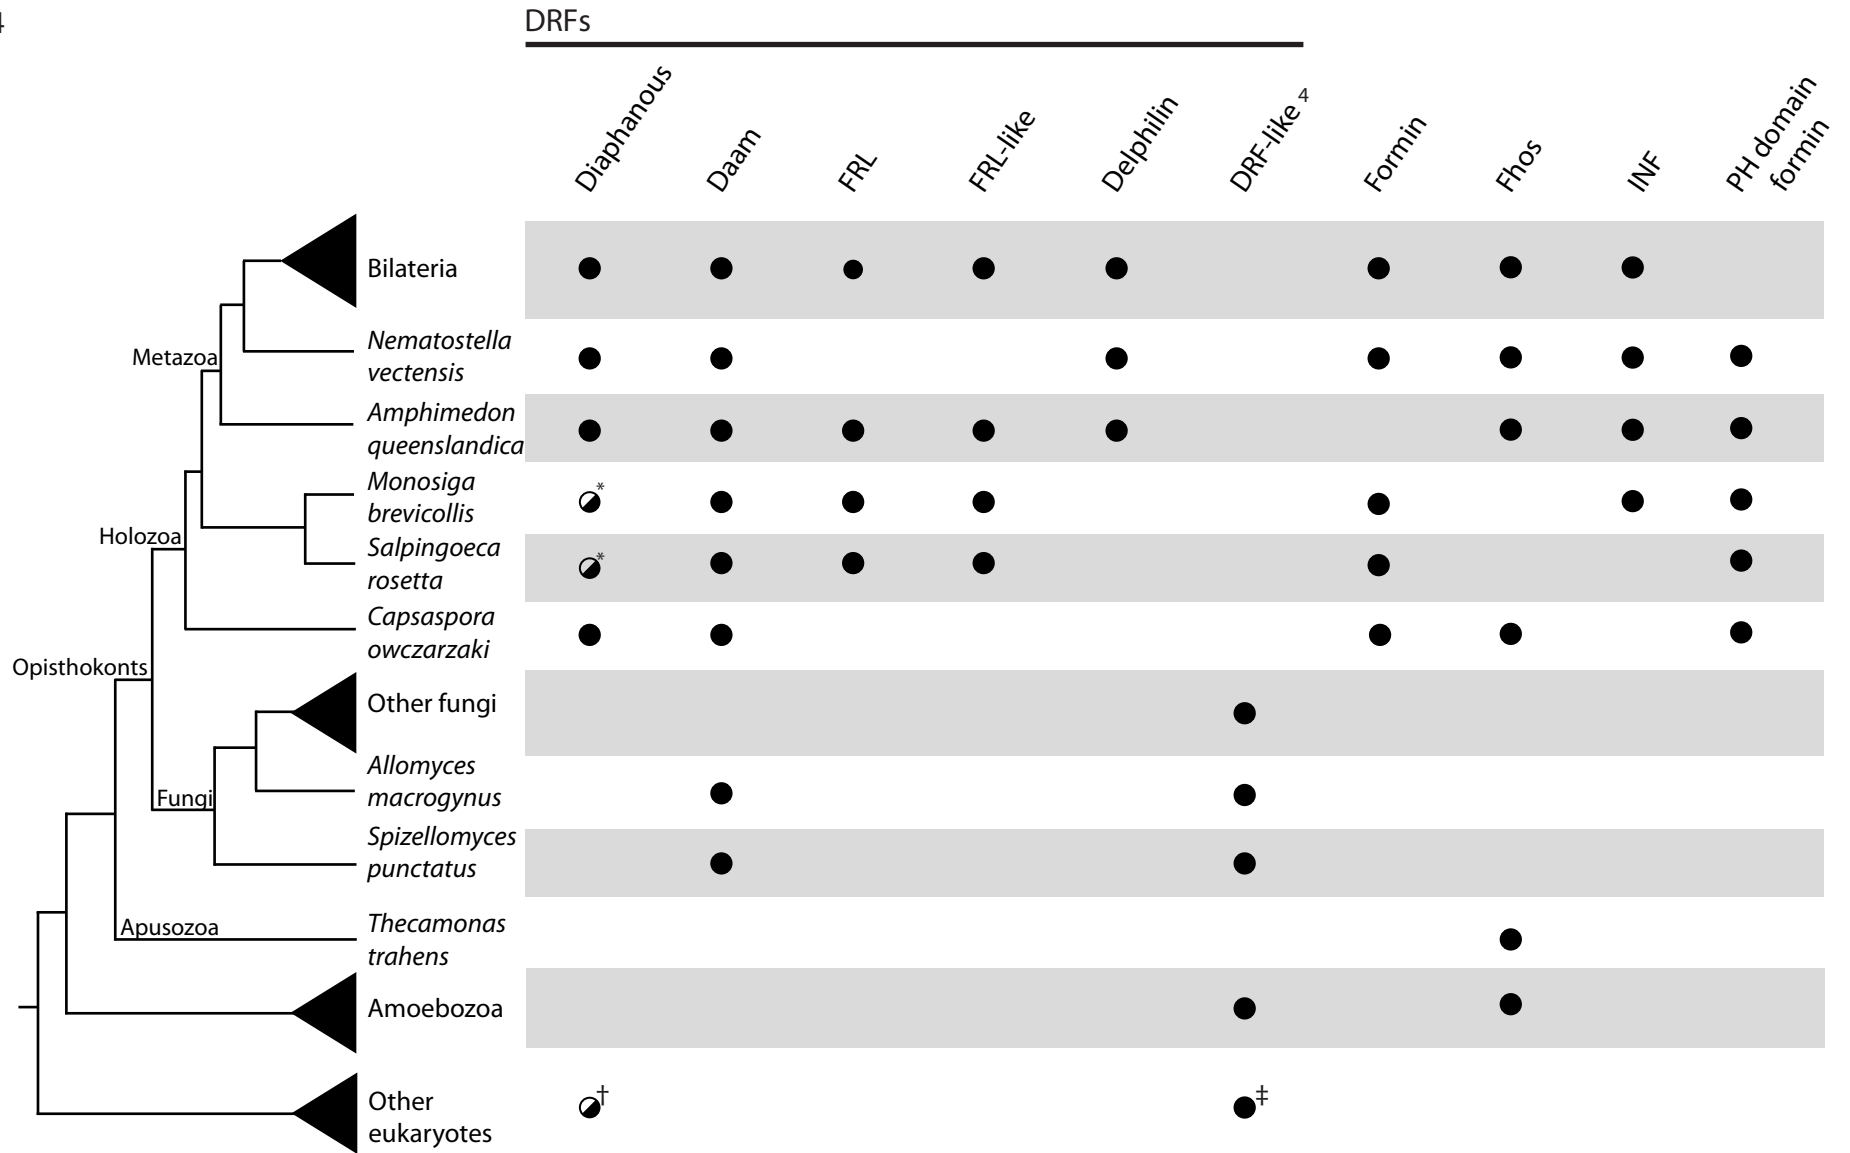

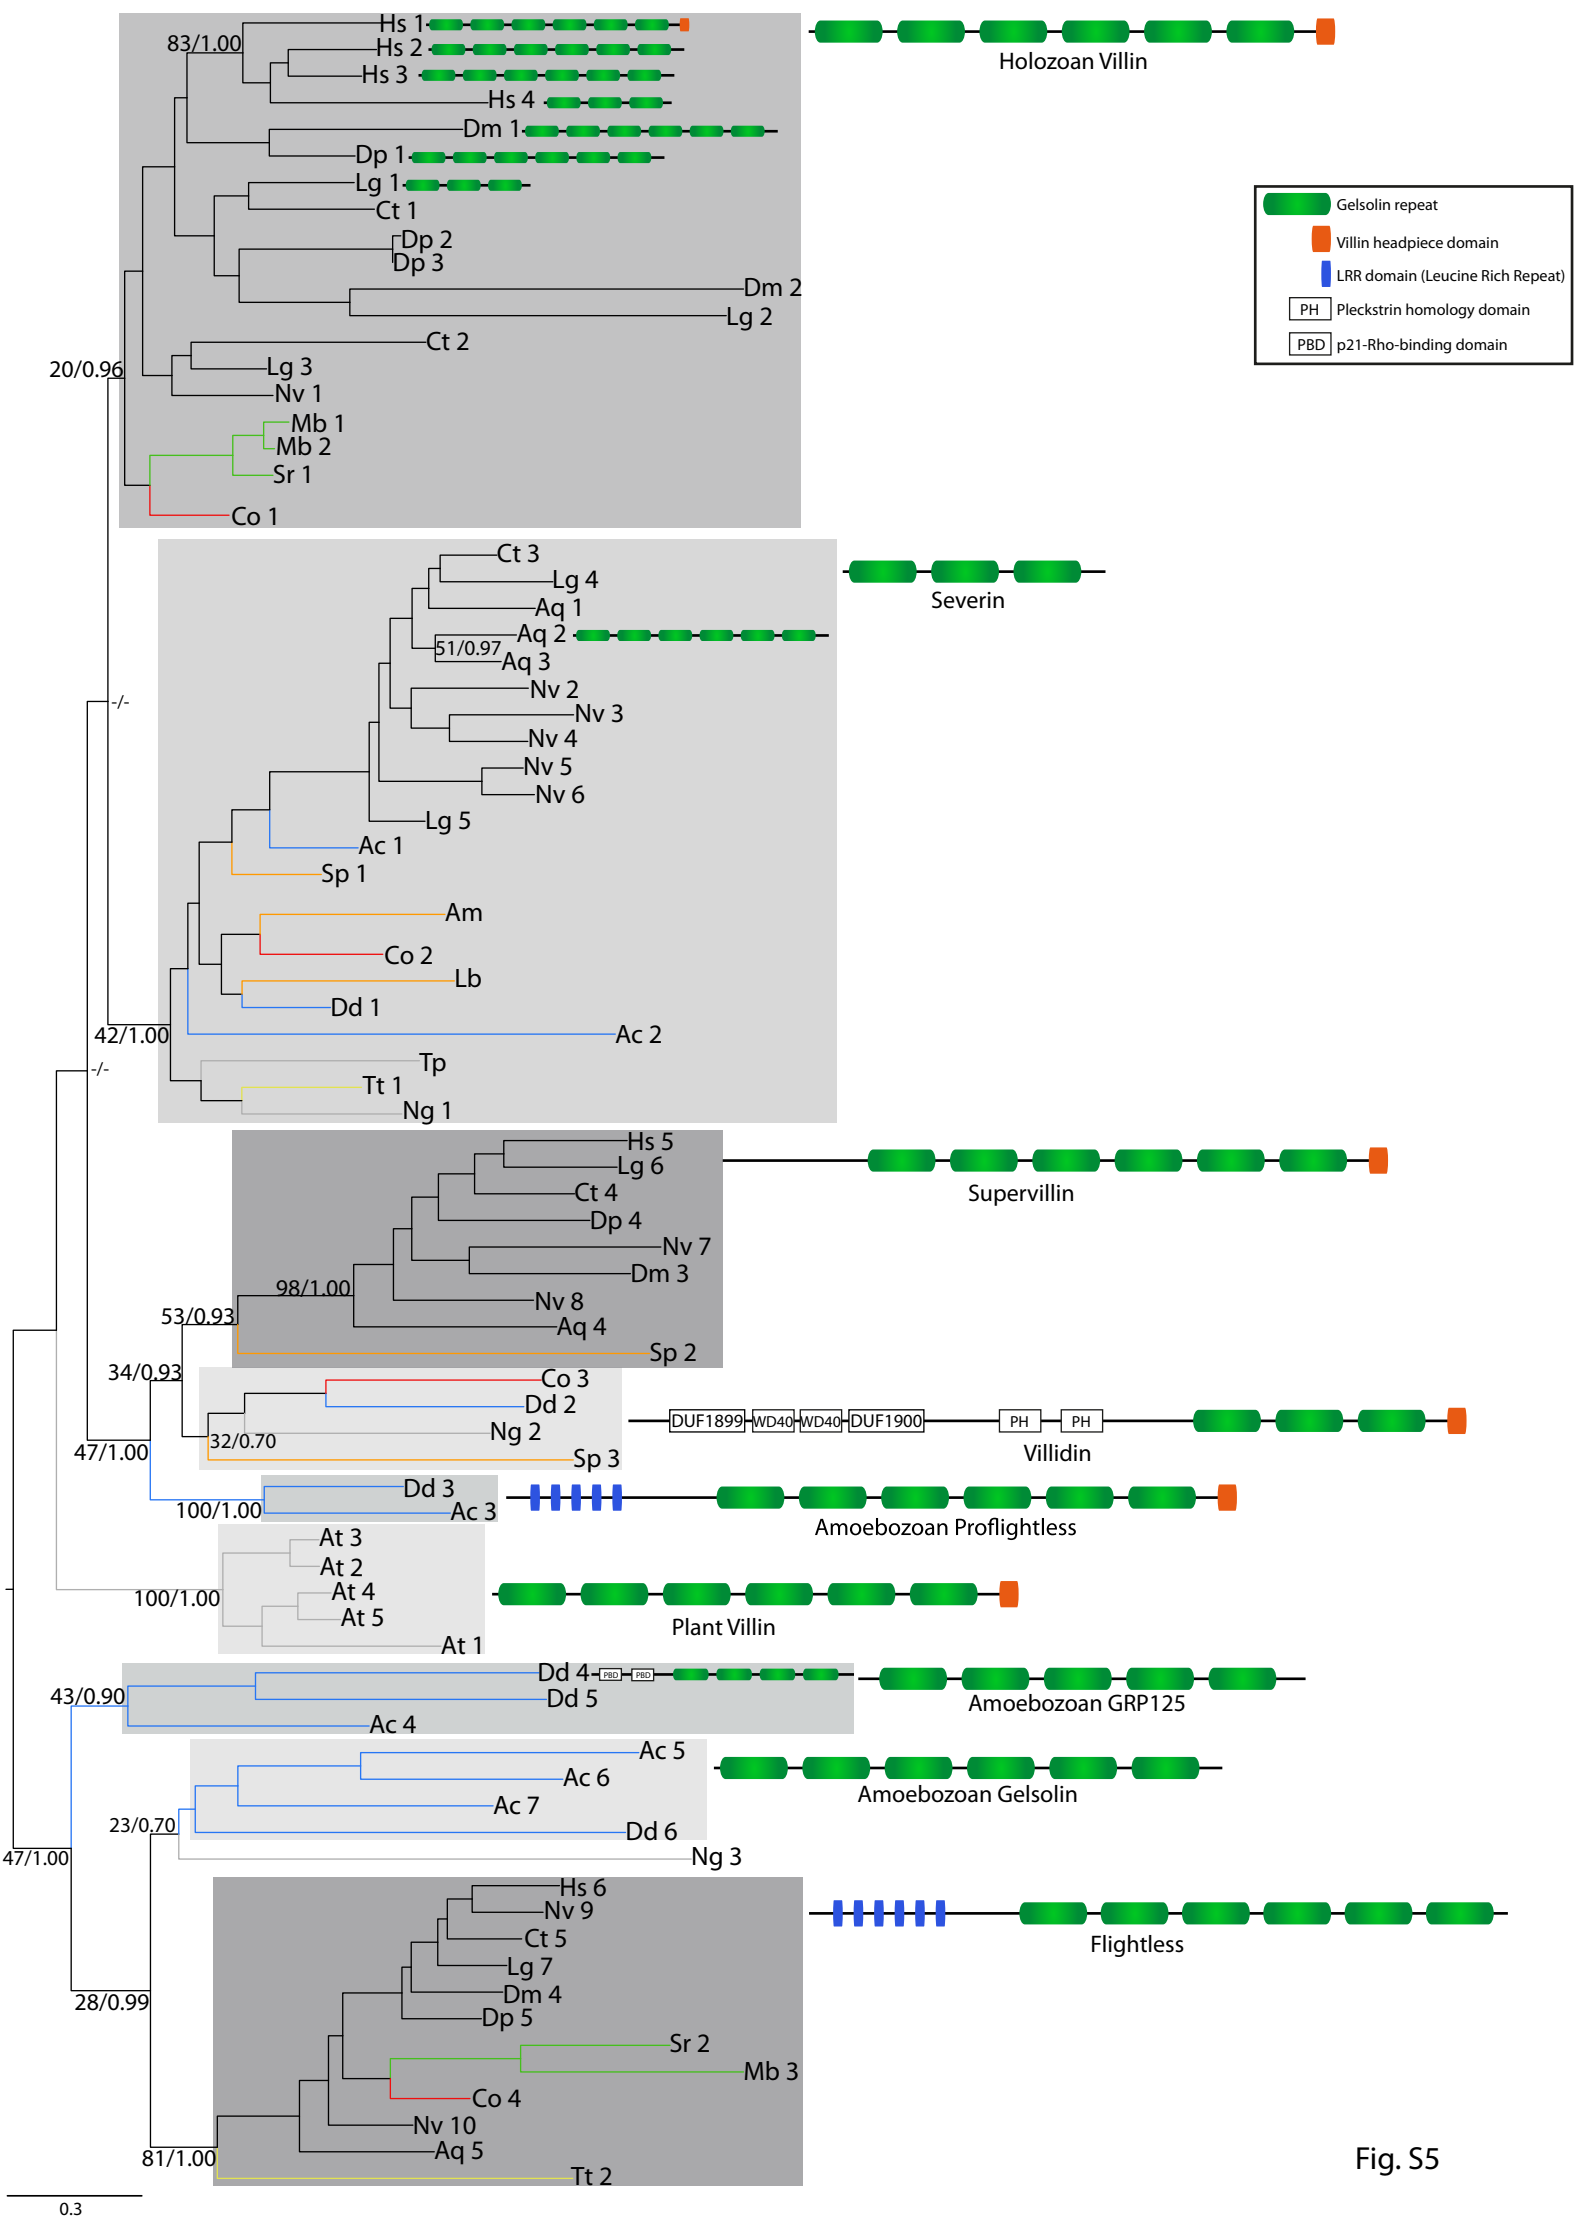

Fig. S5



Fig. S6

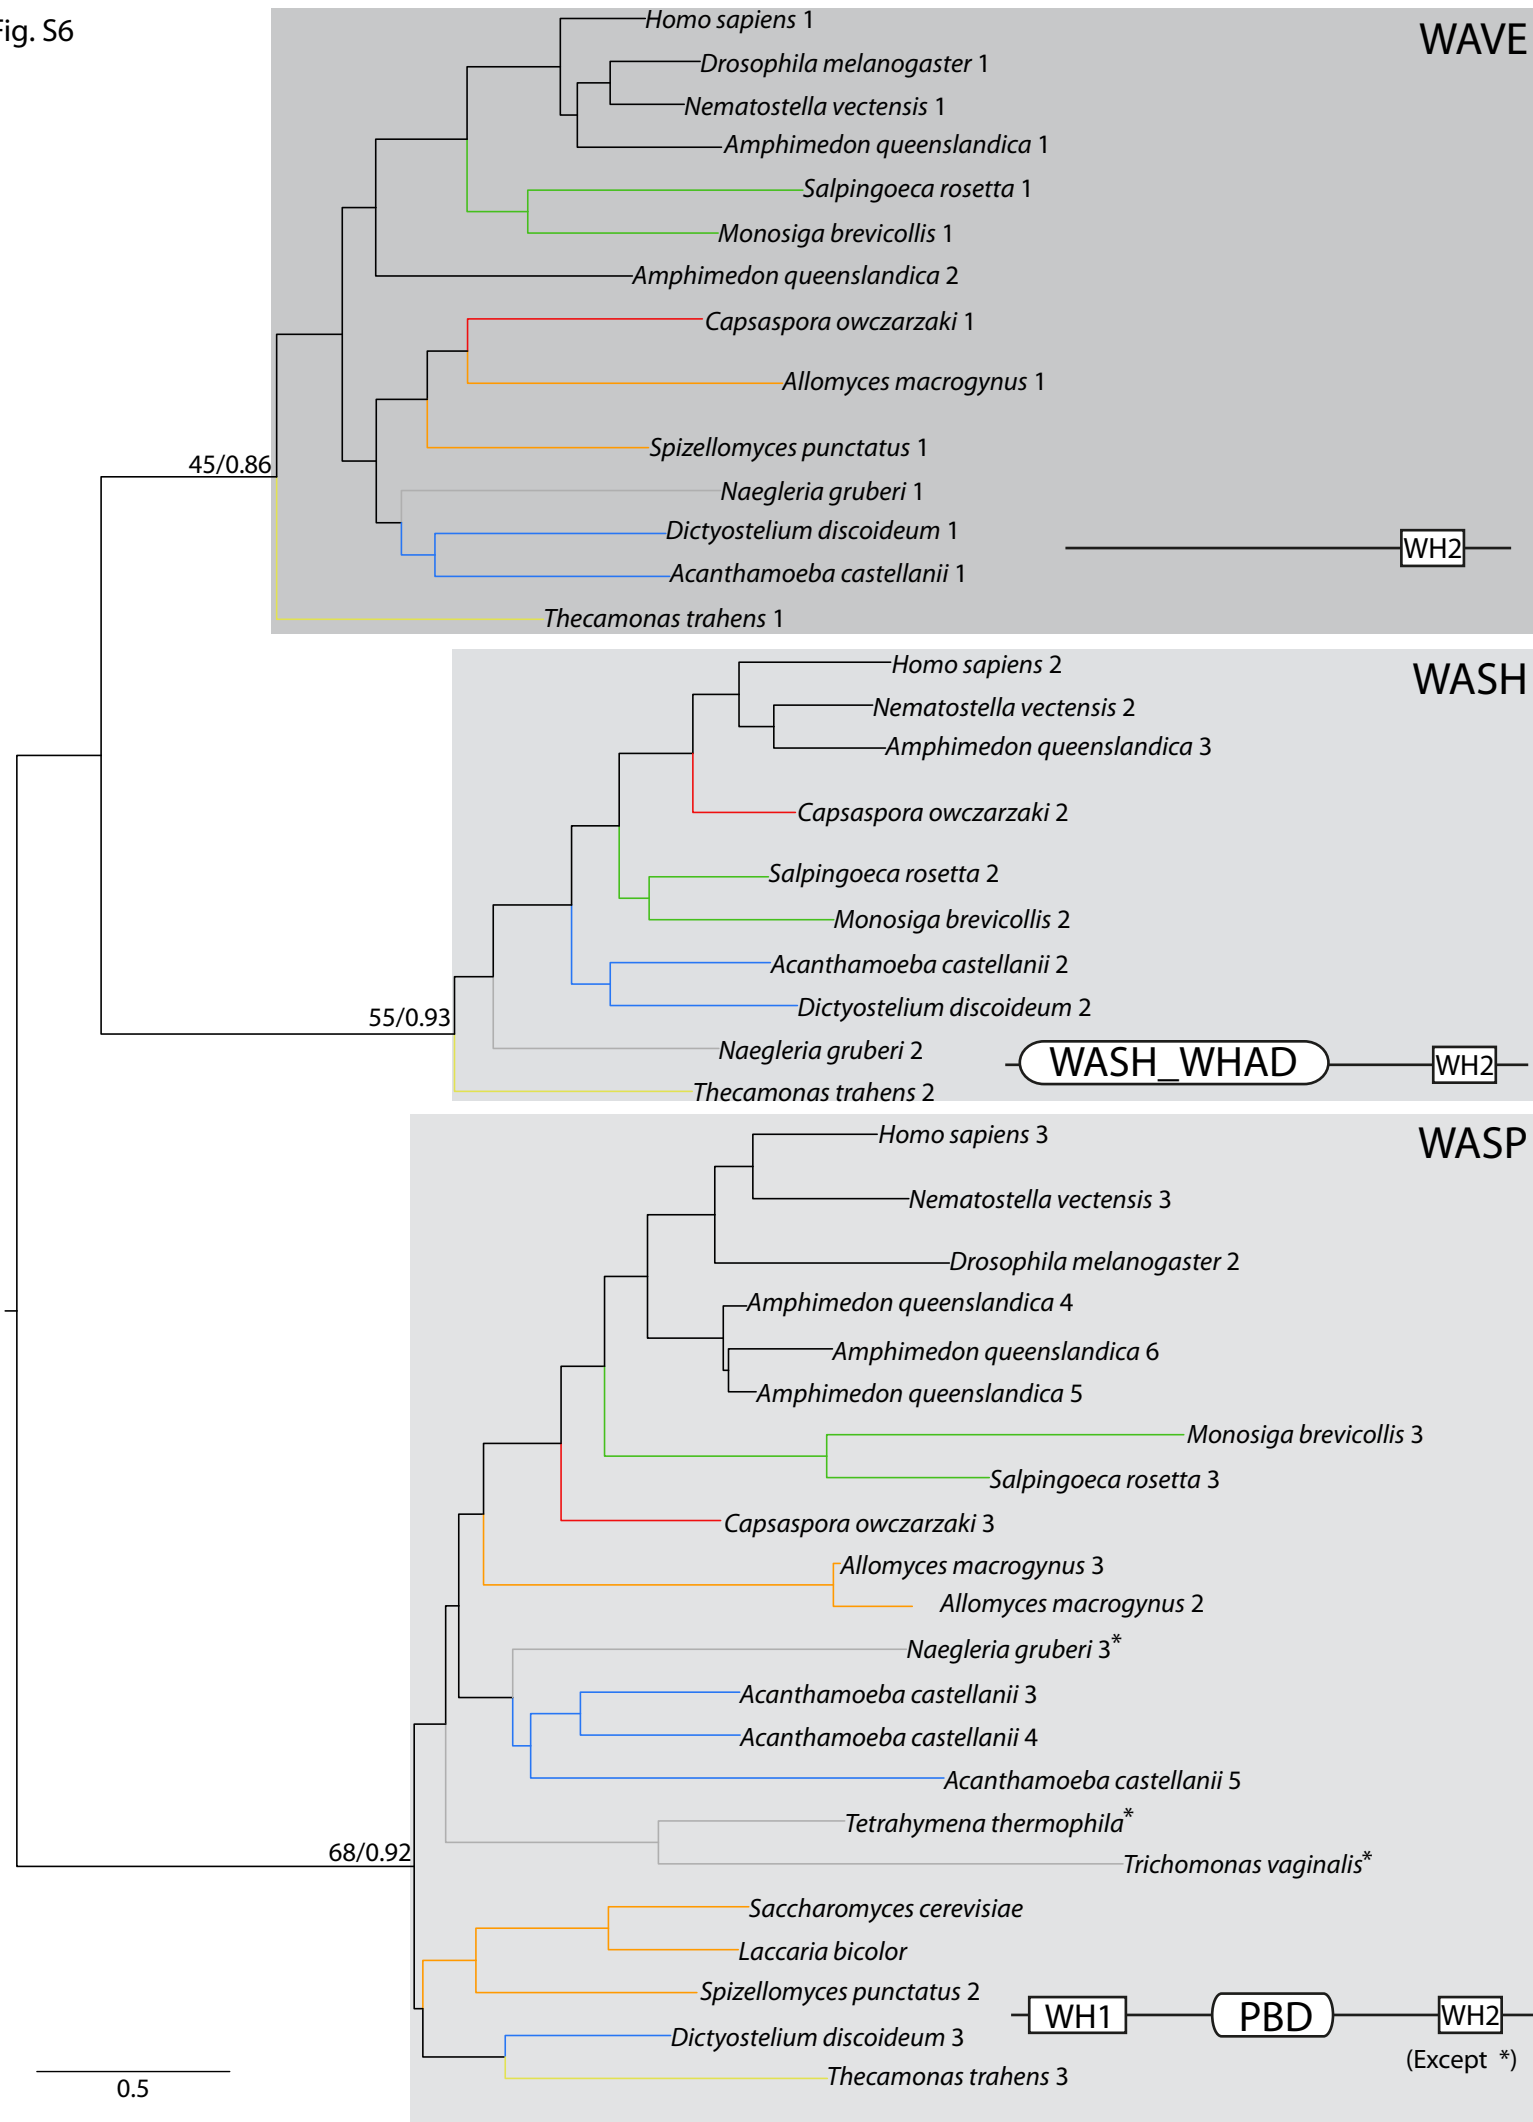

Fig. S7

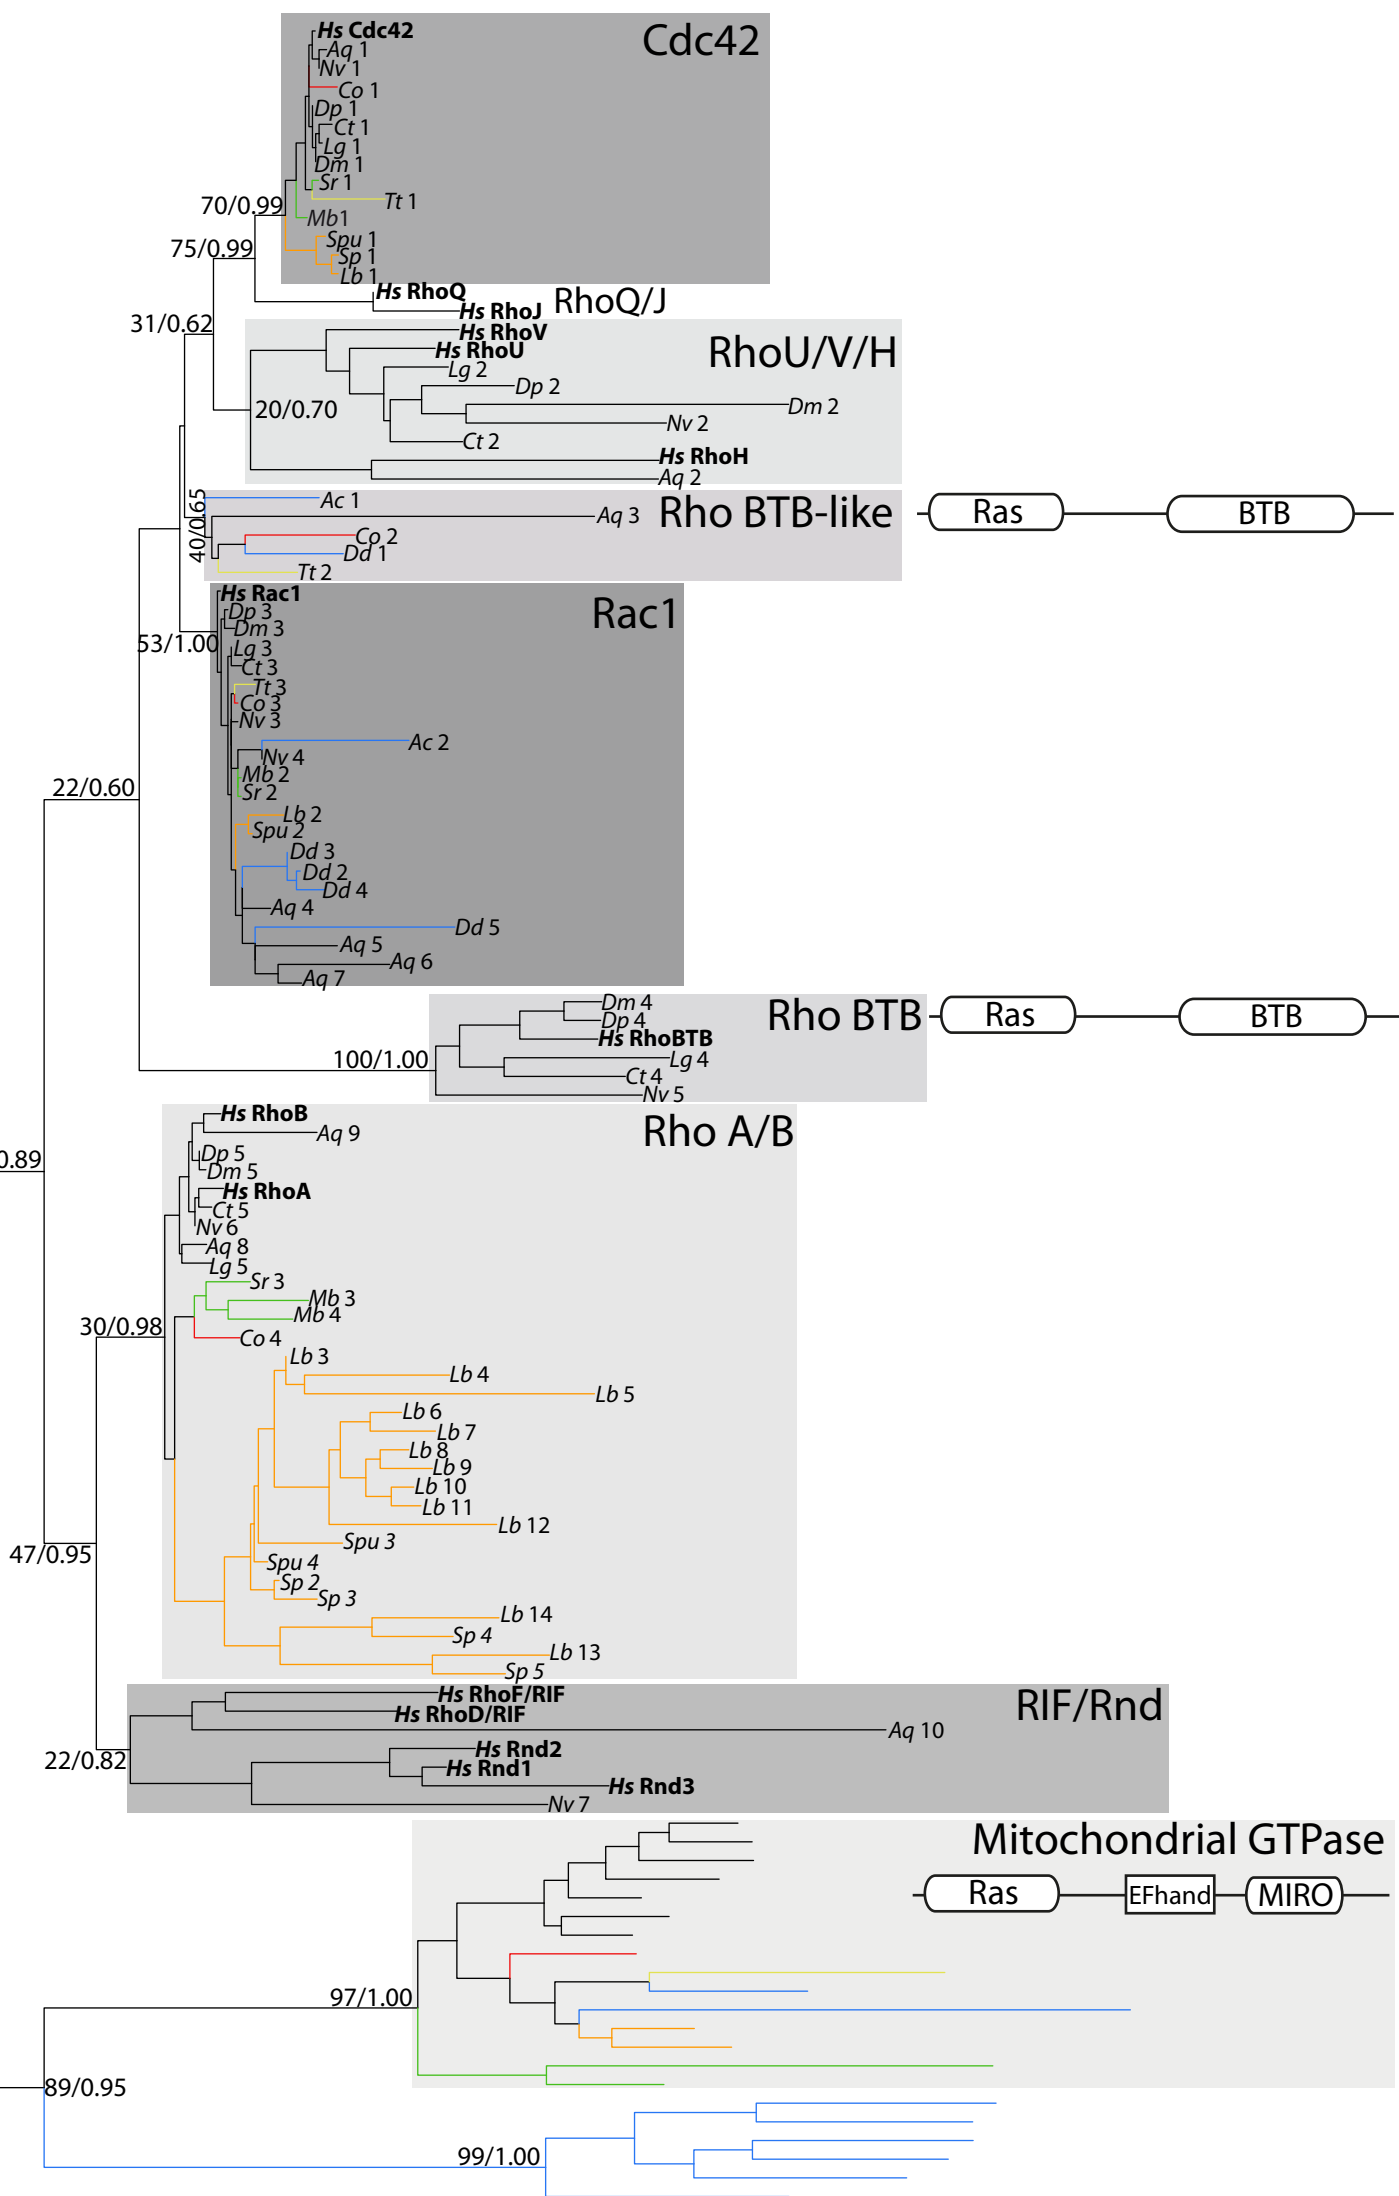

Fig. S8

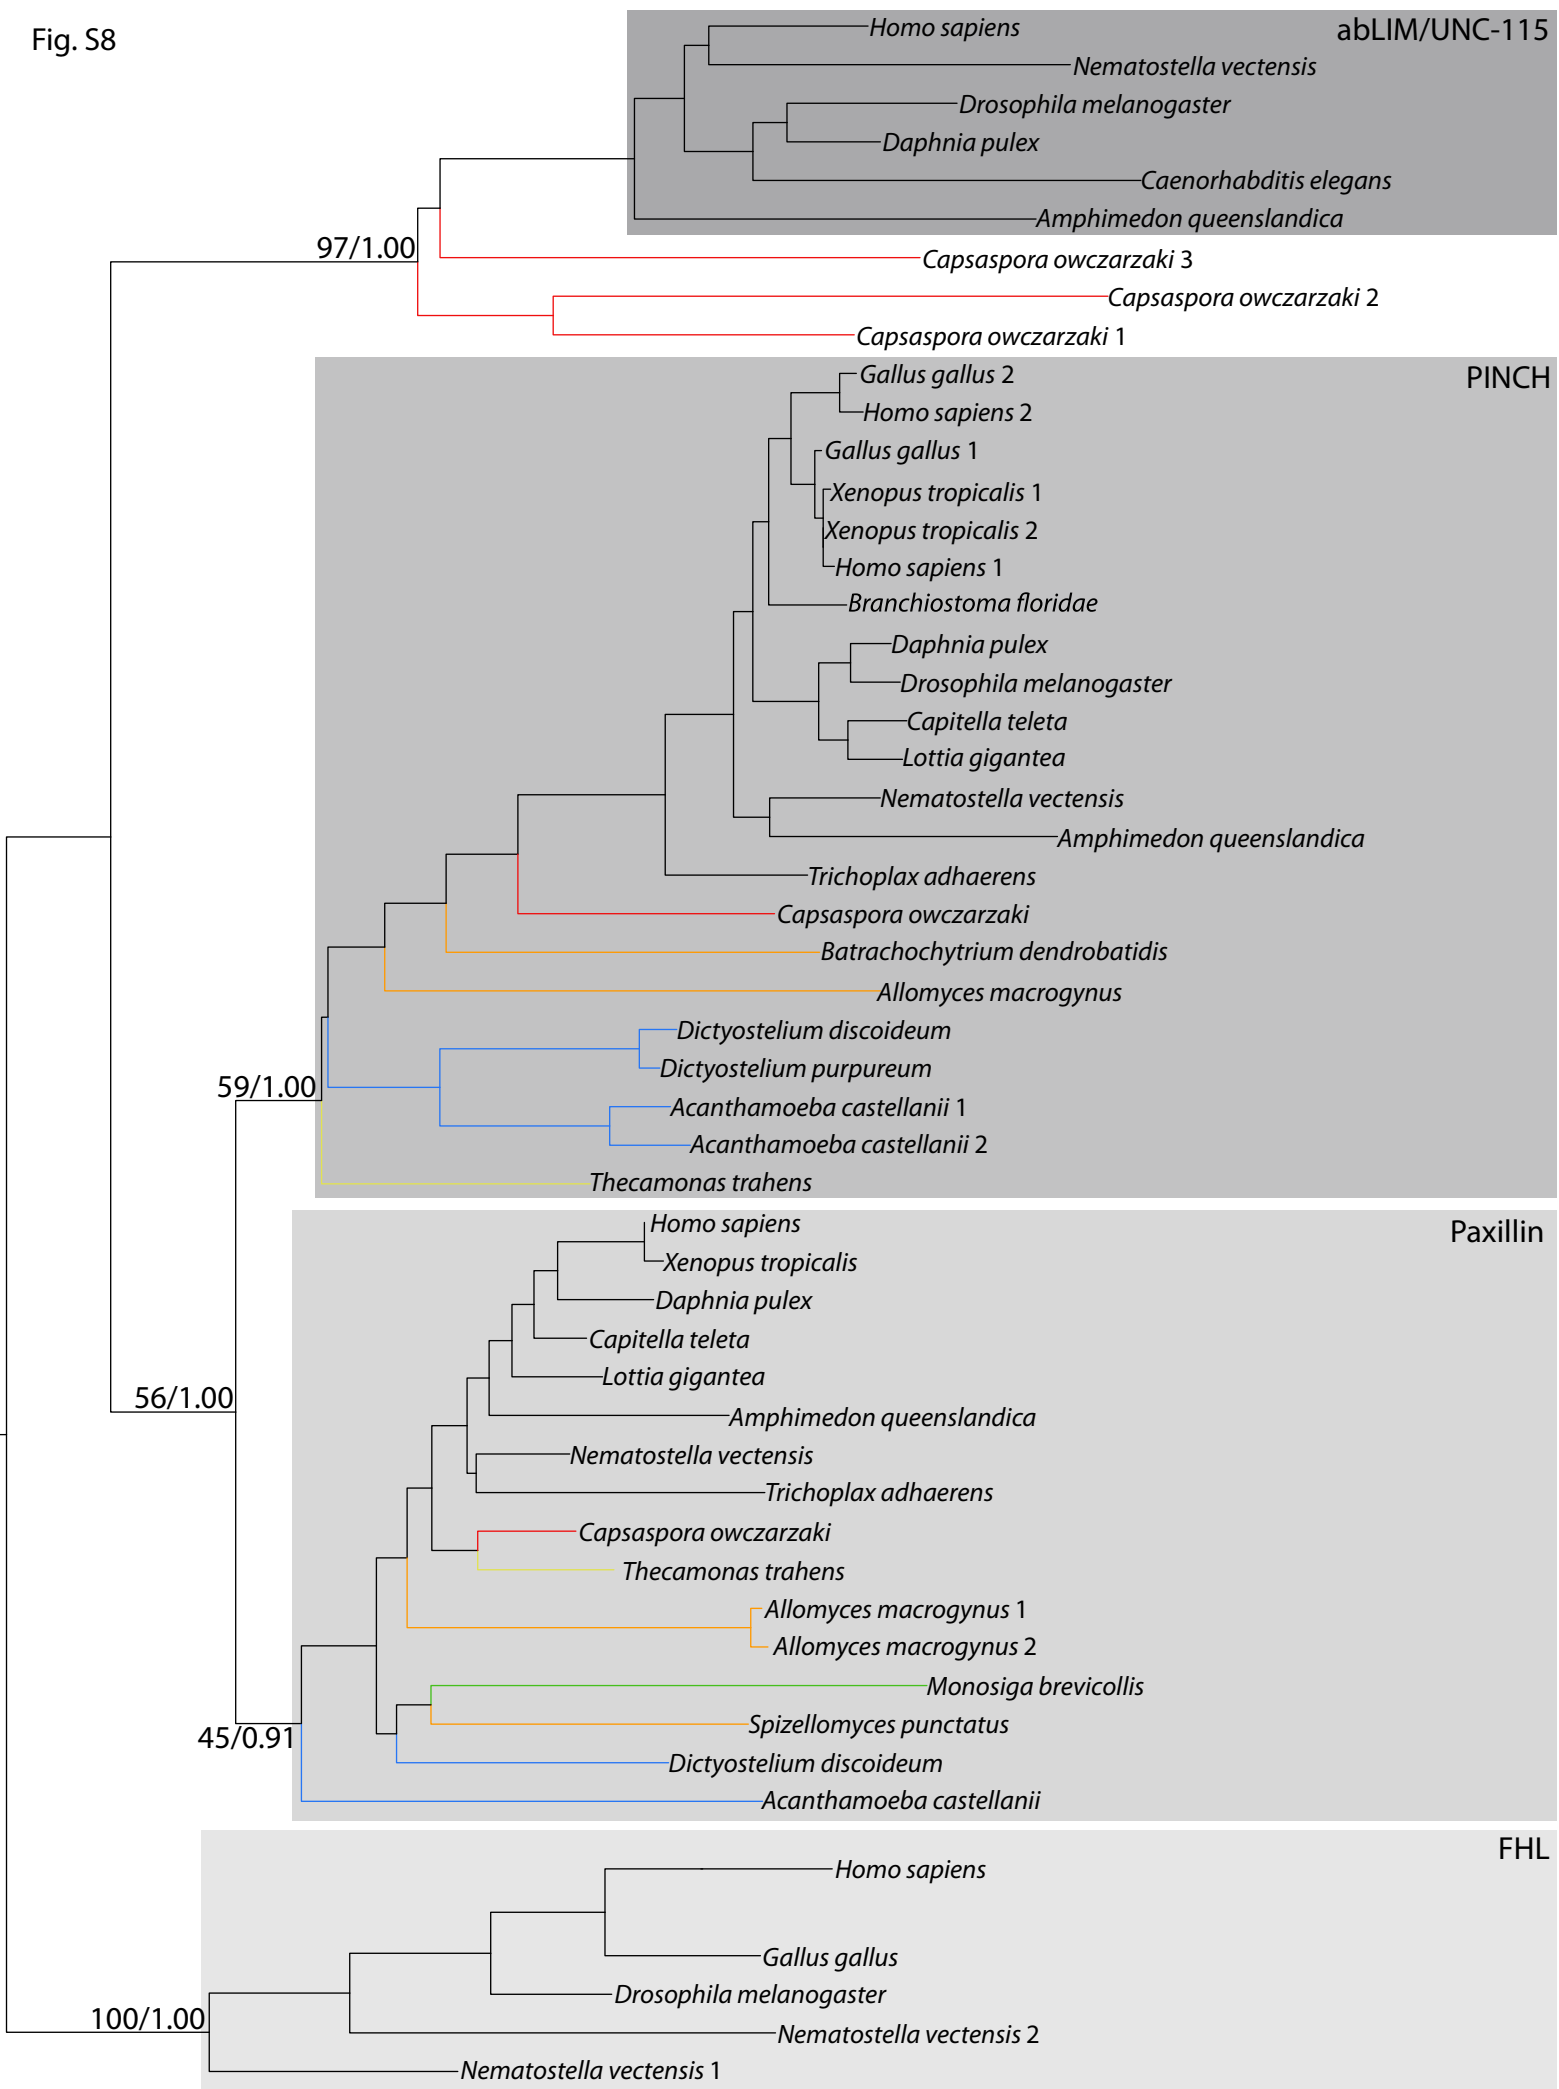

0.4

Fig. S9

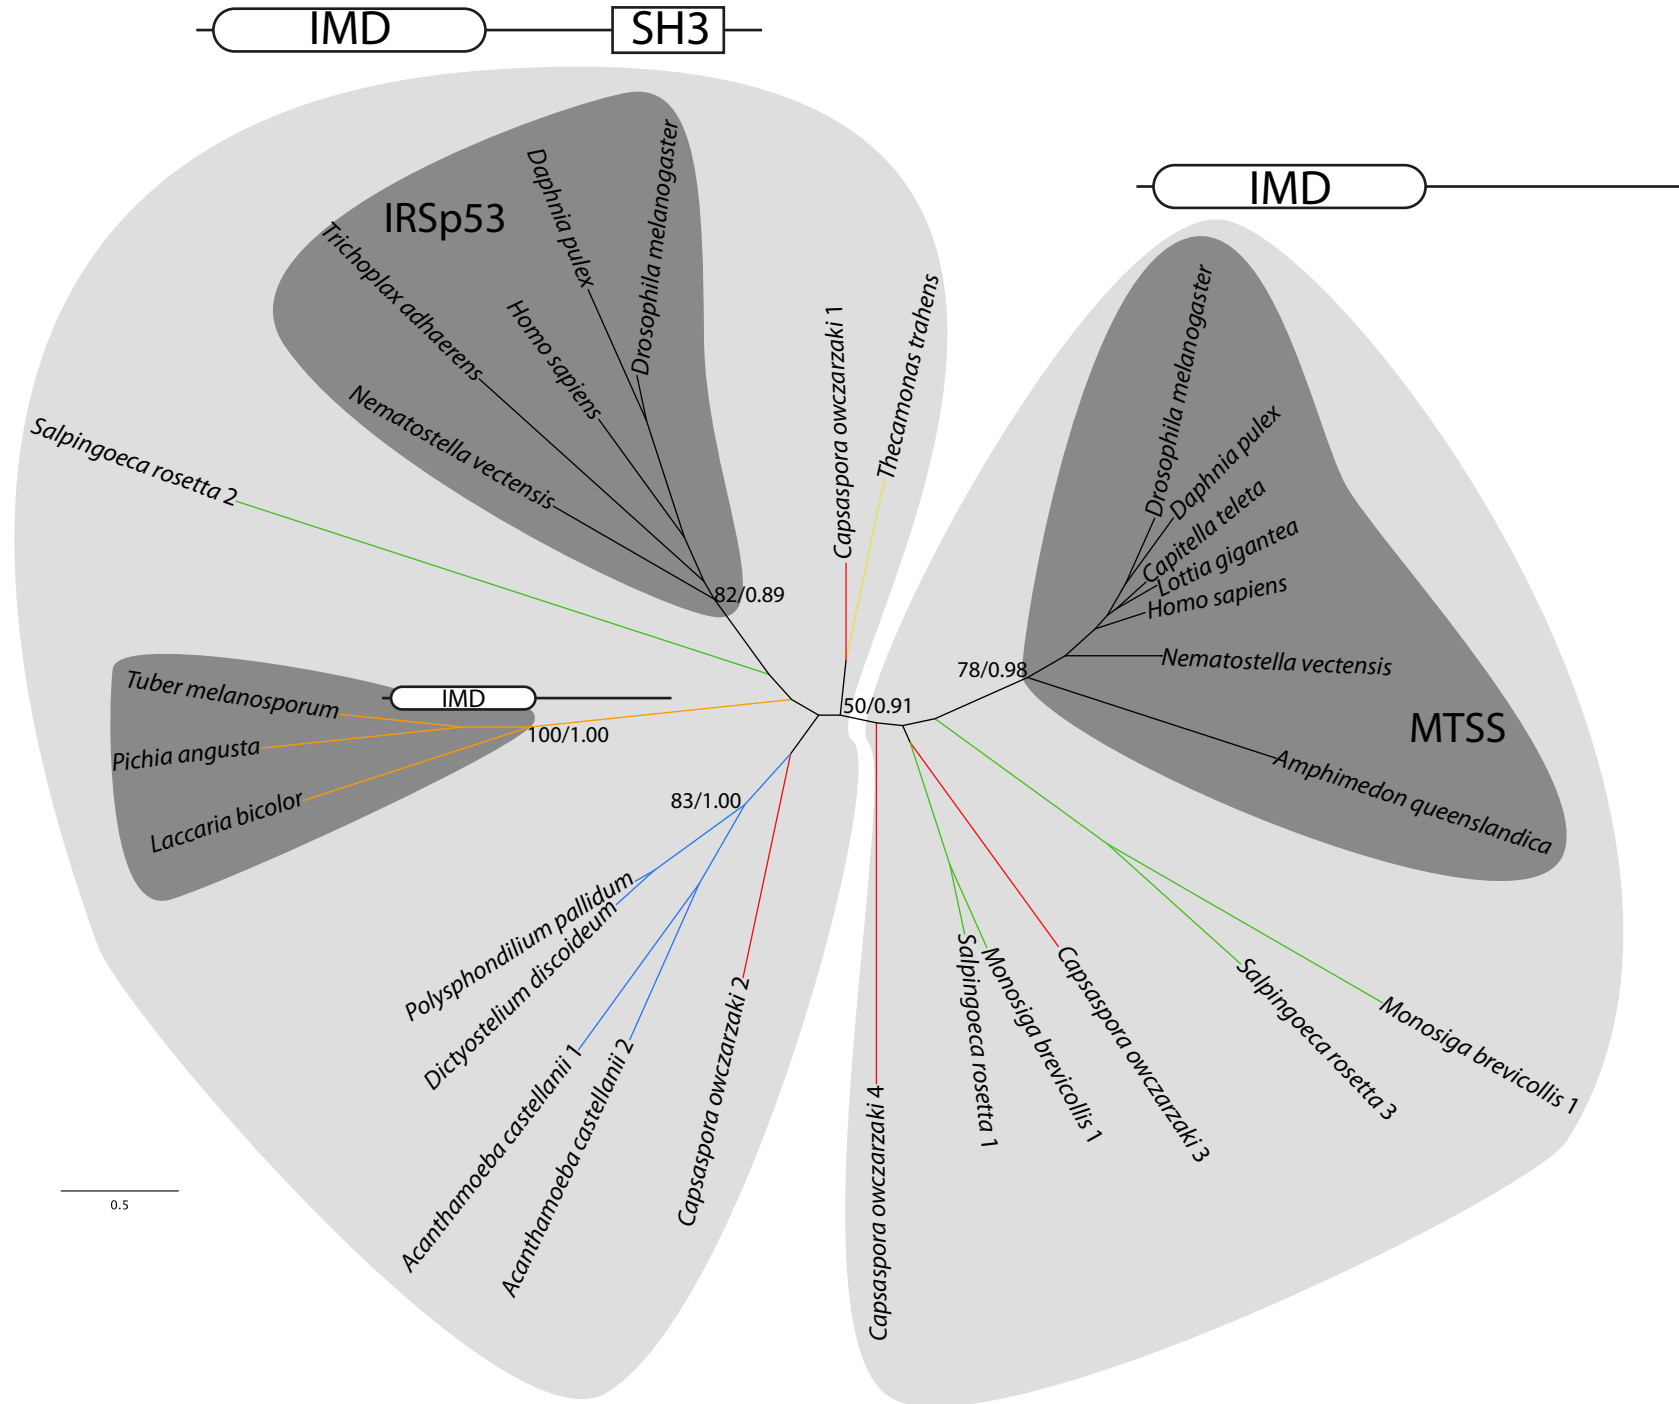

Supplement: supp_mst110_SupplementaryFigures.pdf [file supp_mst110_SupplementaryFigures.pdf]
